# Supplementary material for: Ultrathin HNb3O8 nanosheet: an efficient photocatalyst for the hydrogen production
Source: Royal Society of Chemistry journal article supplement (doi:10.1039/c5ta04755b), 2015-01-01
Supplement: c5ta04755b1.pdf [file c5ta04755b1.pdf]

†Electronic Supplementary Information

**Ultrathin  $\text{HNb}_3\text{O}_8$  nanosheet: An efficient photocatalyst for the  
hydrogen production**

Jinhua Xiong, Linrui Wen, Fan Jiang, Yuhao Liu, Shijing Liang\*, Ling Wu\*

State key laboratory of photocatalysis on energy and environment, Fuzhou University,

Fuzhou 350002, P. R. China

\* Corresponding author: Ling Wu

E-mail: wuling@fzu.edu.cn

Phone: +86-591-83779362

Fax: +86-591-83779105

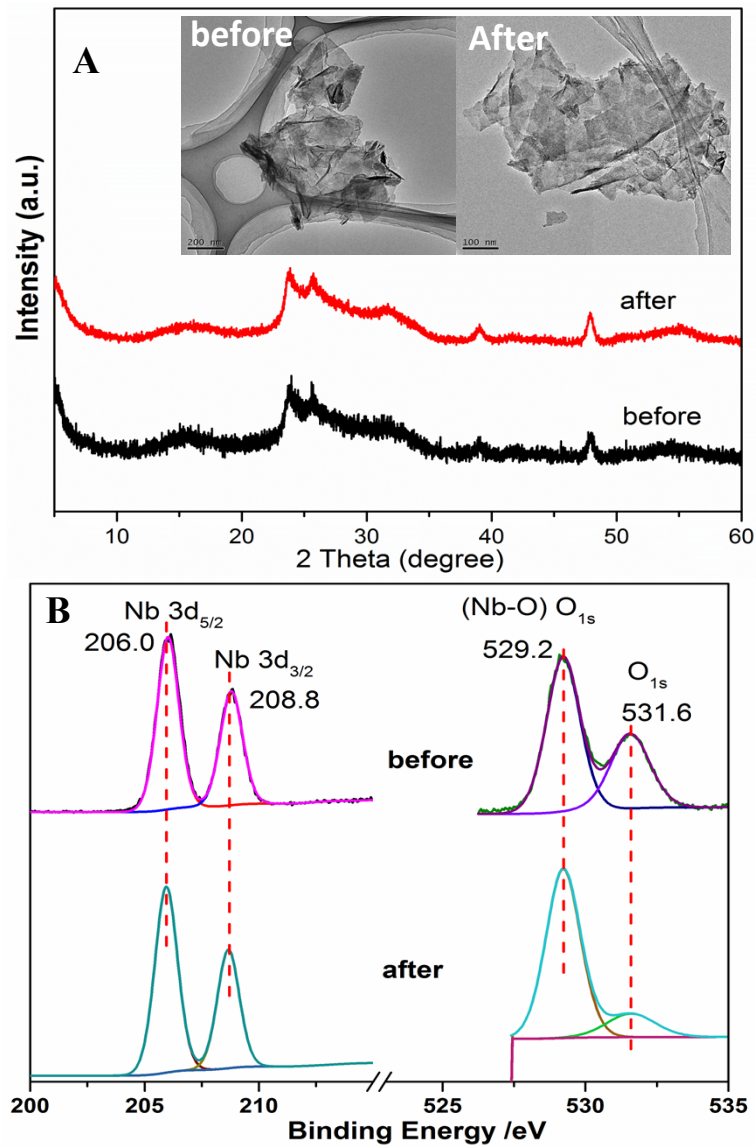

Fig. S1A and B were the XRD patterns and the XPS spectra for the  $\text{HNb}_3\text{O}_8$  nanosheet before and after the photocatalysis, respectively. The insets in A are the corresponding TEM images of the  $\text{HNb}_3\text{O}_8$  nanosheet before and after the photocatalysis.

As shown in Fig. S1, the XRD patterns, morphology and the XPS spectra of the  $\text{HNb}_3\text{O}_8$  nanosheet showed no distinct variation before and after the photocatalytic reaction. Hence, it can be deduced that the photocatalyst has an excellent stability.
